# Supplementary material for: Sensitive and rapid DPV detection of urinary homovanillic acid via g-C 3 N 4 @nZVI modified carbon paste sensor
Source: Royal Society of Chemistry journal article supplement (doi:10.1039/d5ra08154h), 2026-01-01
Supplement: d5ra08154h1.pdf [file d5ra08154h1.pdf]

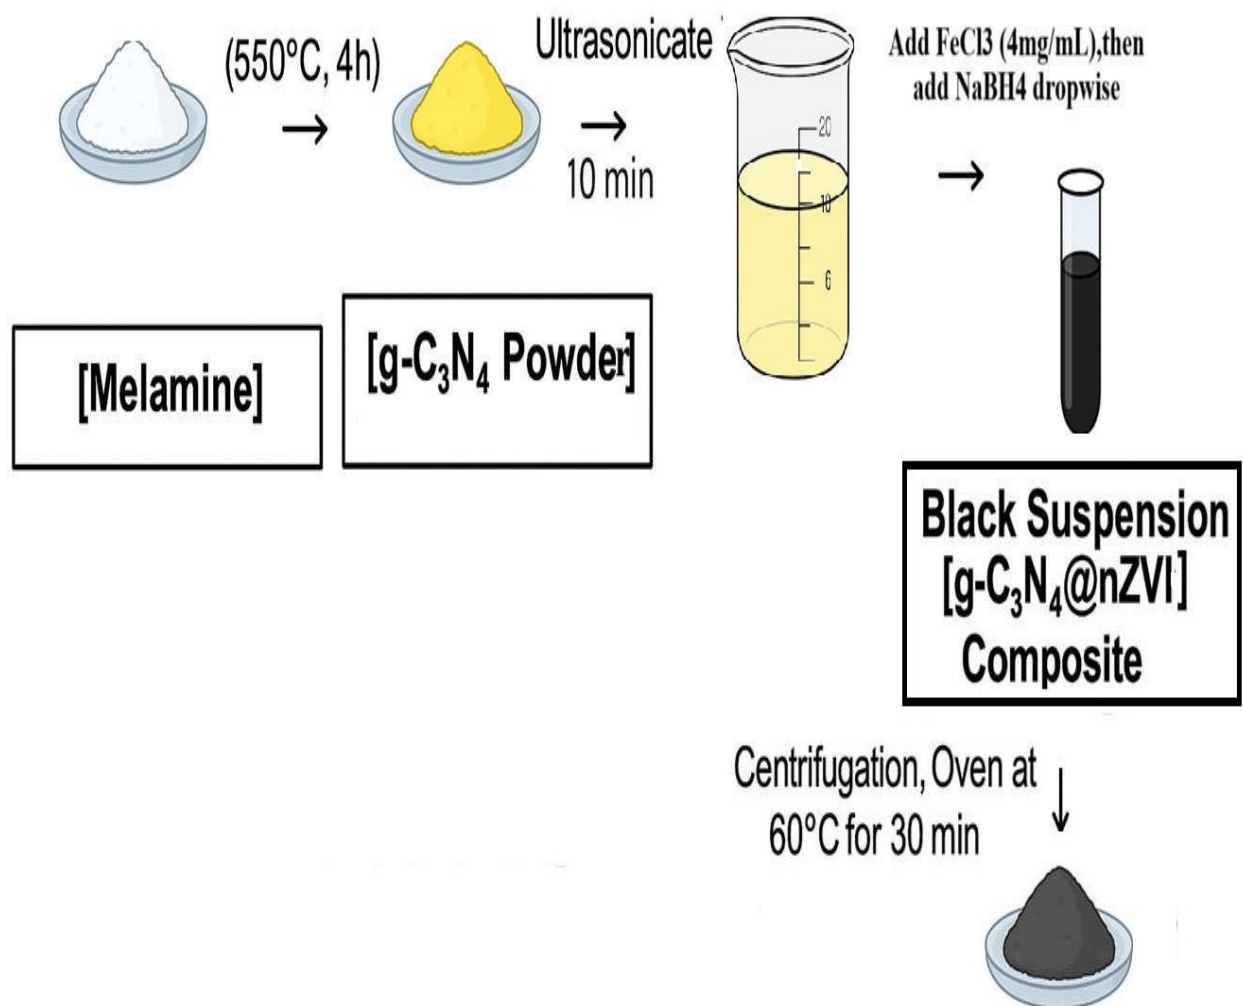

**Fig. S1** Schematic representation of the  $g\text{-C}_3\text{N}_4@n\text{ZVI}$  synthesis procedure

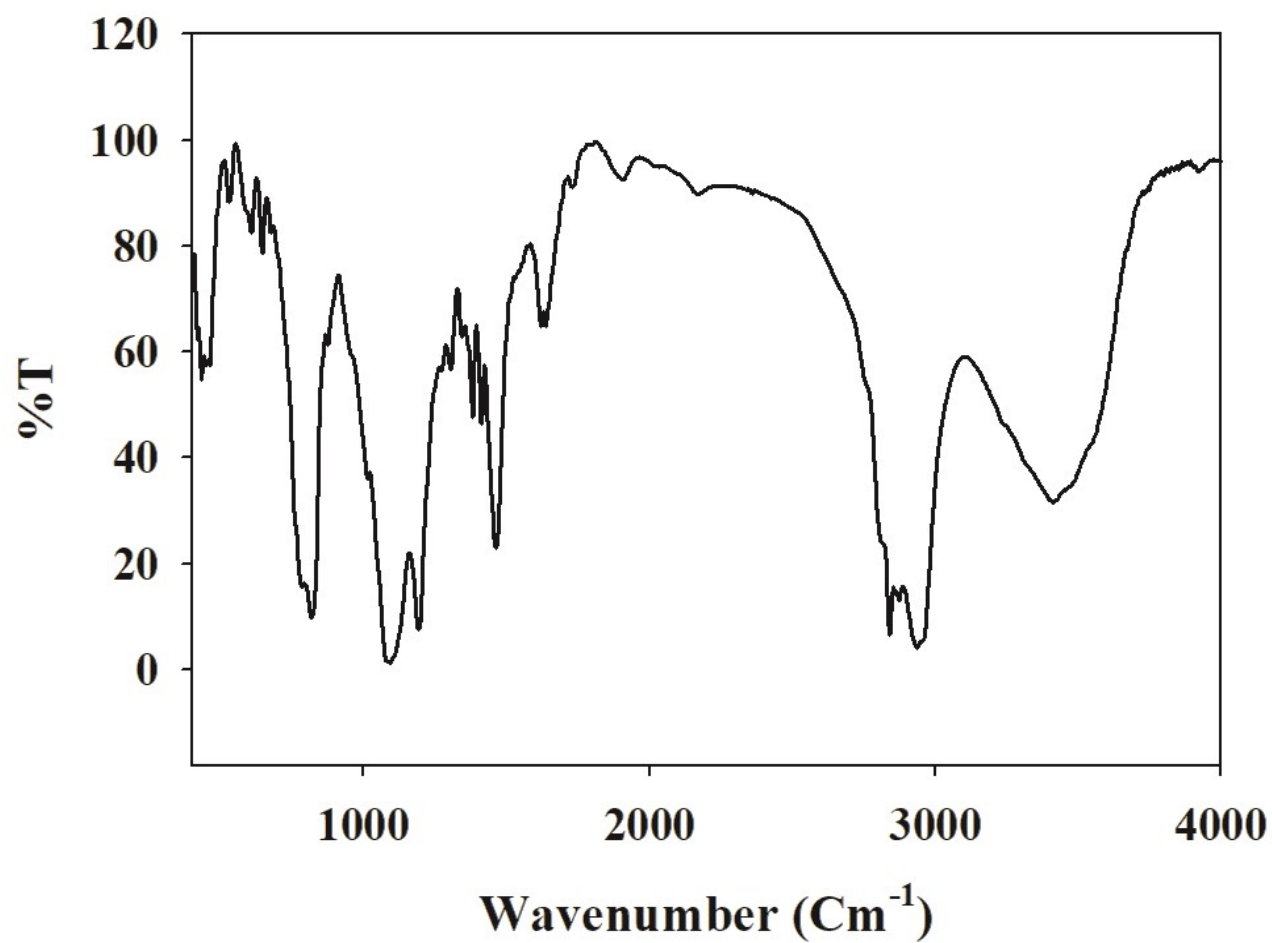

**Fig. S2.** IR of g -C<sub>3</sub>N<sub>4</sub>@n ZVI nanocomposite.

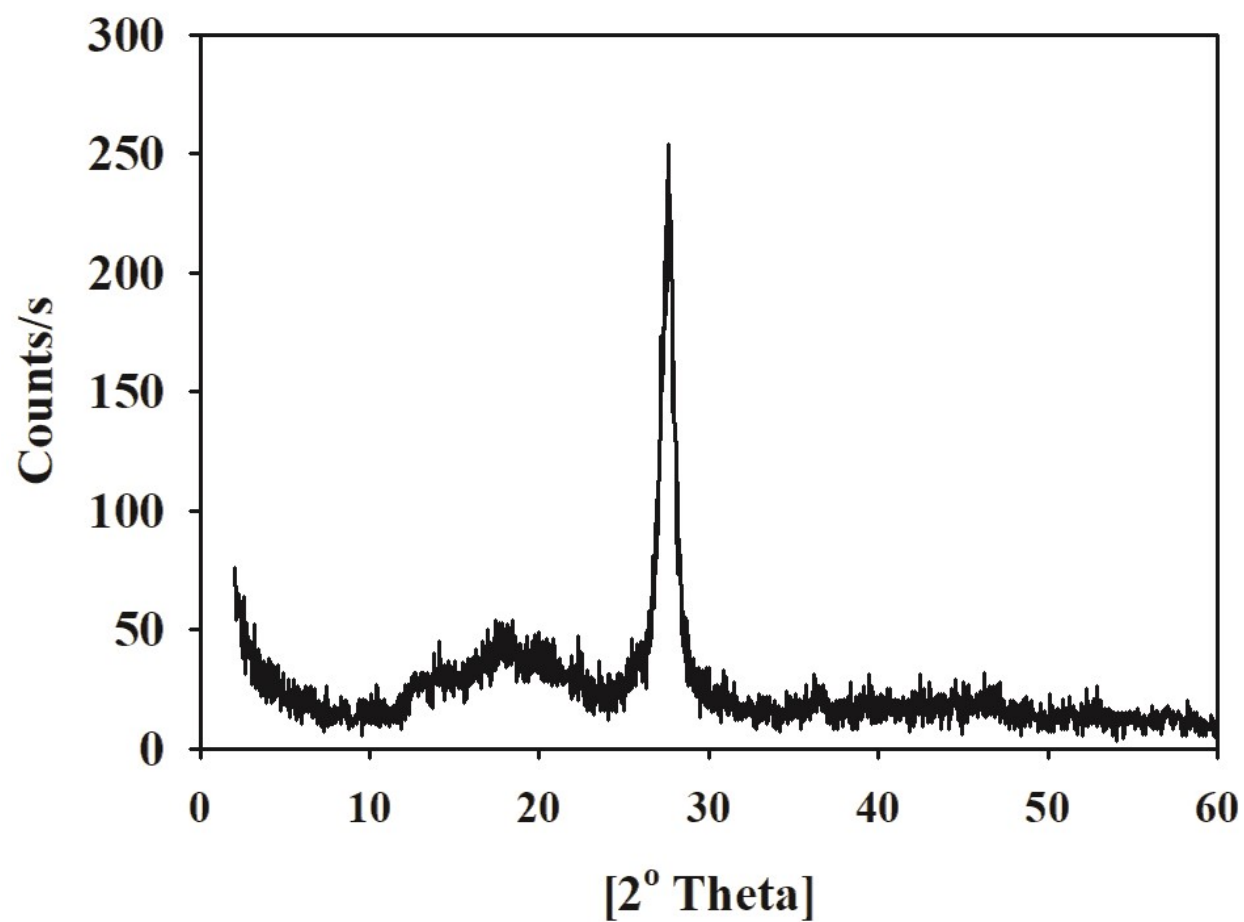

**Fig. S3.** XRD analysis of g -C<sub>3</sub>N<sub>4</sub>@n ZVI nanocomposite.

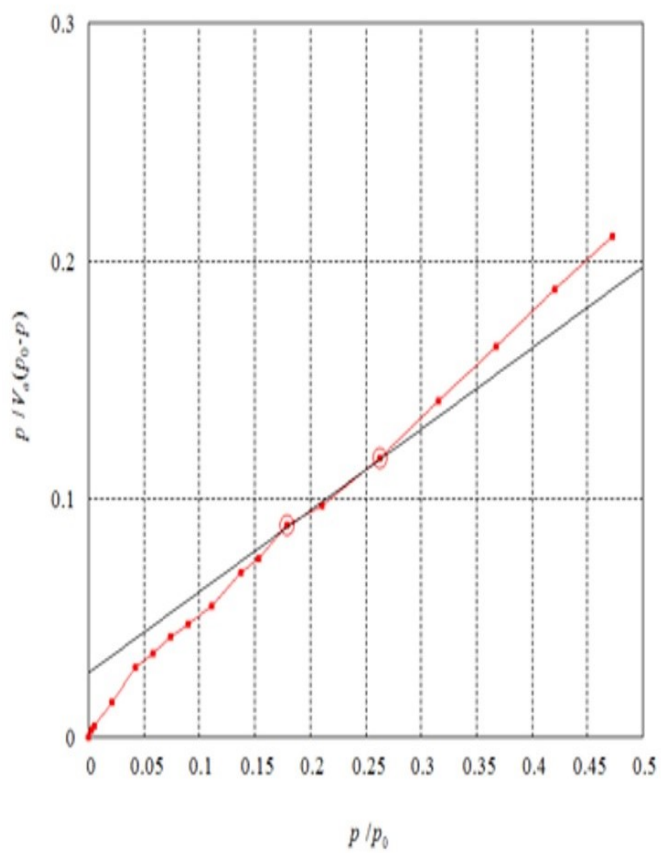

**(a)** BET-Plot

Adsorptive N2  
Adsorption temperature 77.000[K]

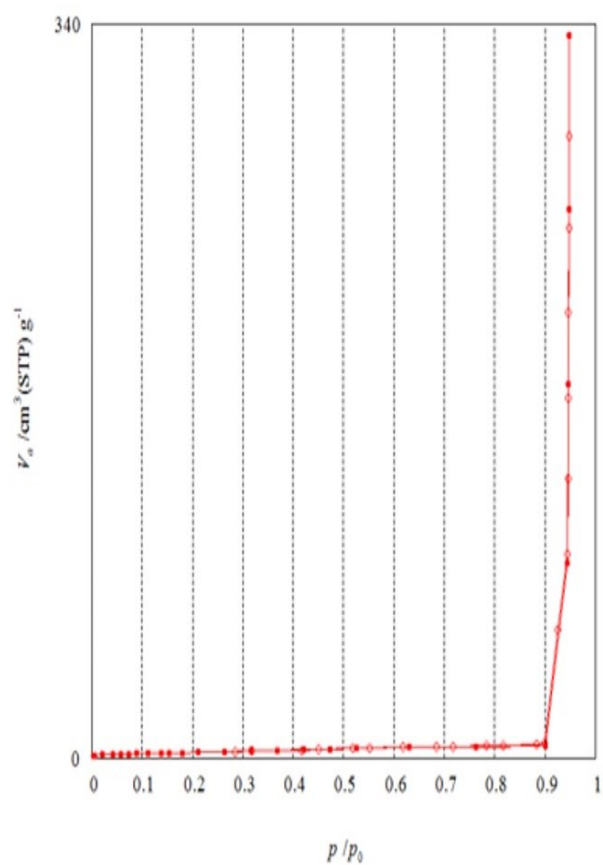

**(b)** Adsorption / desorption isotherm

Adsorptive N2  
Adsorption temperature 77.000[K]

**Fig. S4.** BET analysis of g-C<sub>3</sub>N<sub>4</sub>@n ZVI nanocomposite.

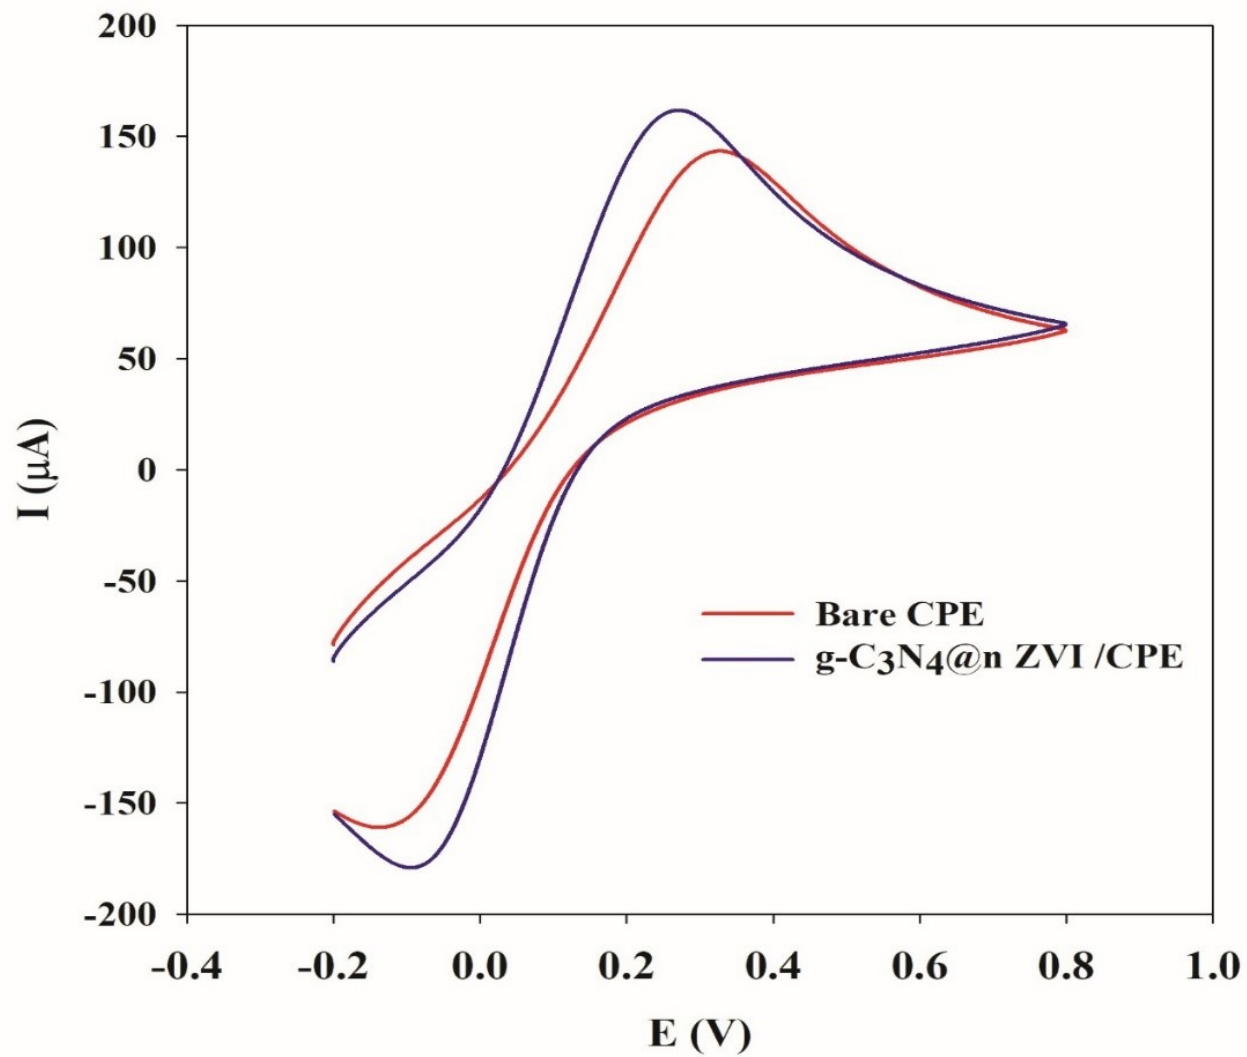

**Fig. S5** Cyclic voltammograms of bare CPE and  $\text{g-C}_3\text{N}_4@\text{nZVI/CPE}$  in the presence of the 10.0 mM  $[\text{Fe}(\text{CN})_6]^{3-}/[\text{Fe}(\text{CN})_6]^{4-}$  redox system.

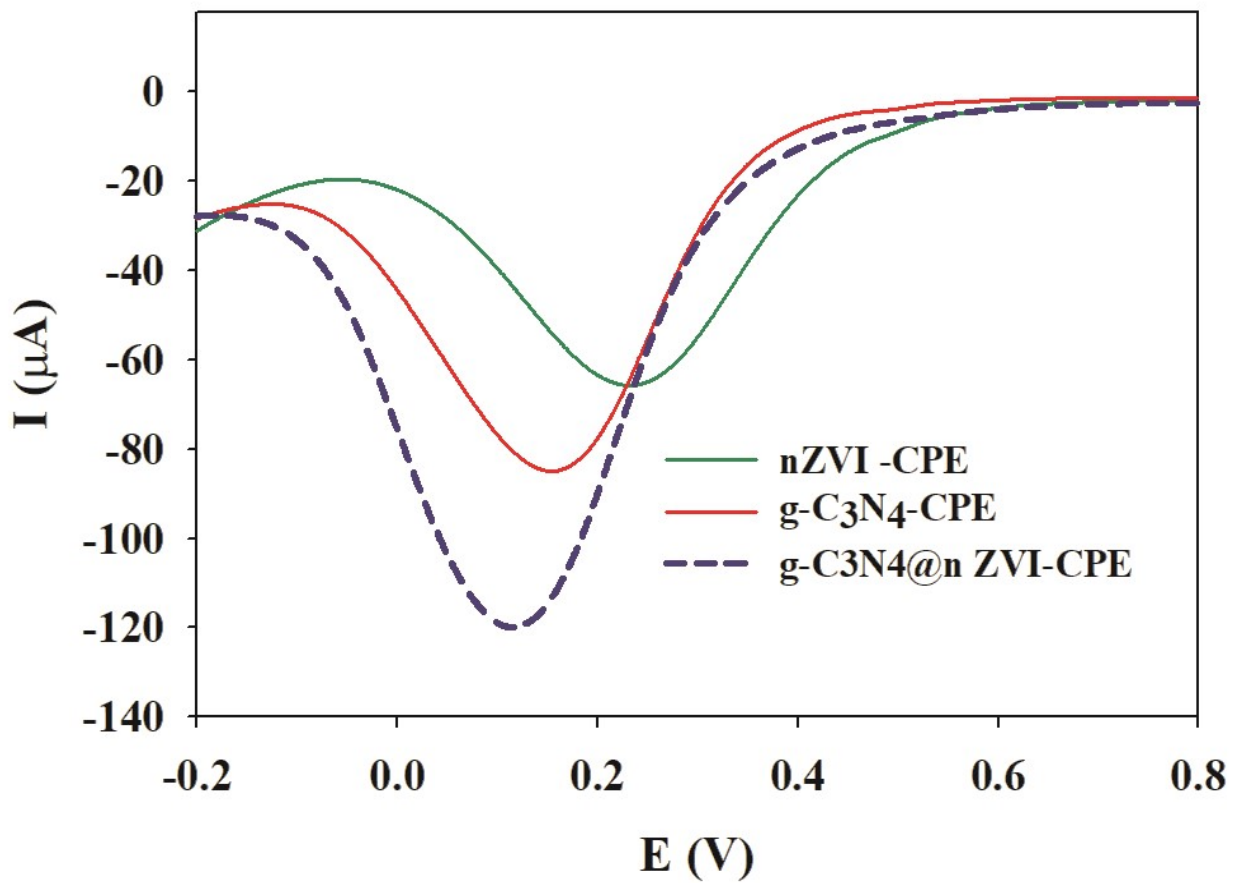

**Fig. S6** DPV of potassium ferro/ferricyanide solution (10.0 mM) in PBS buffer at nZVI/CPE, g-C<sub>3</sub>N<sub>4</sub>/CPE, and g-C<sub>3</sub>N<sub>4</sub>@nZVI/CPE.

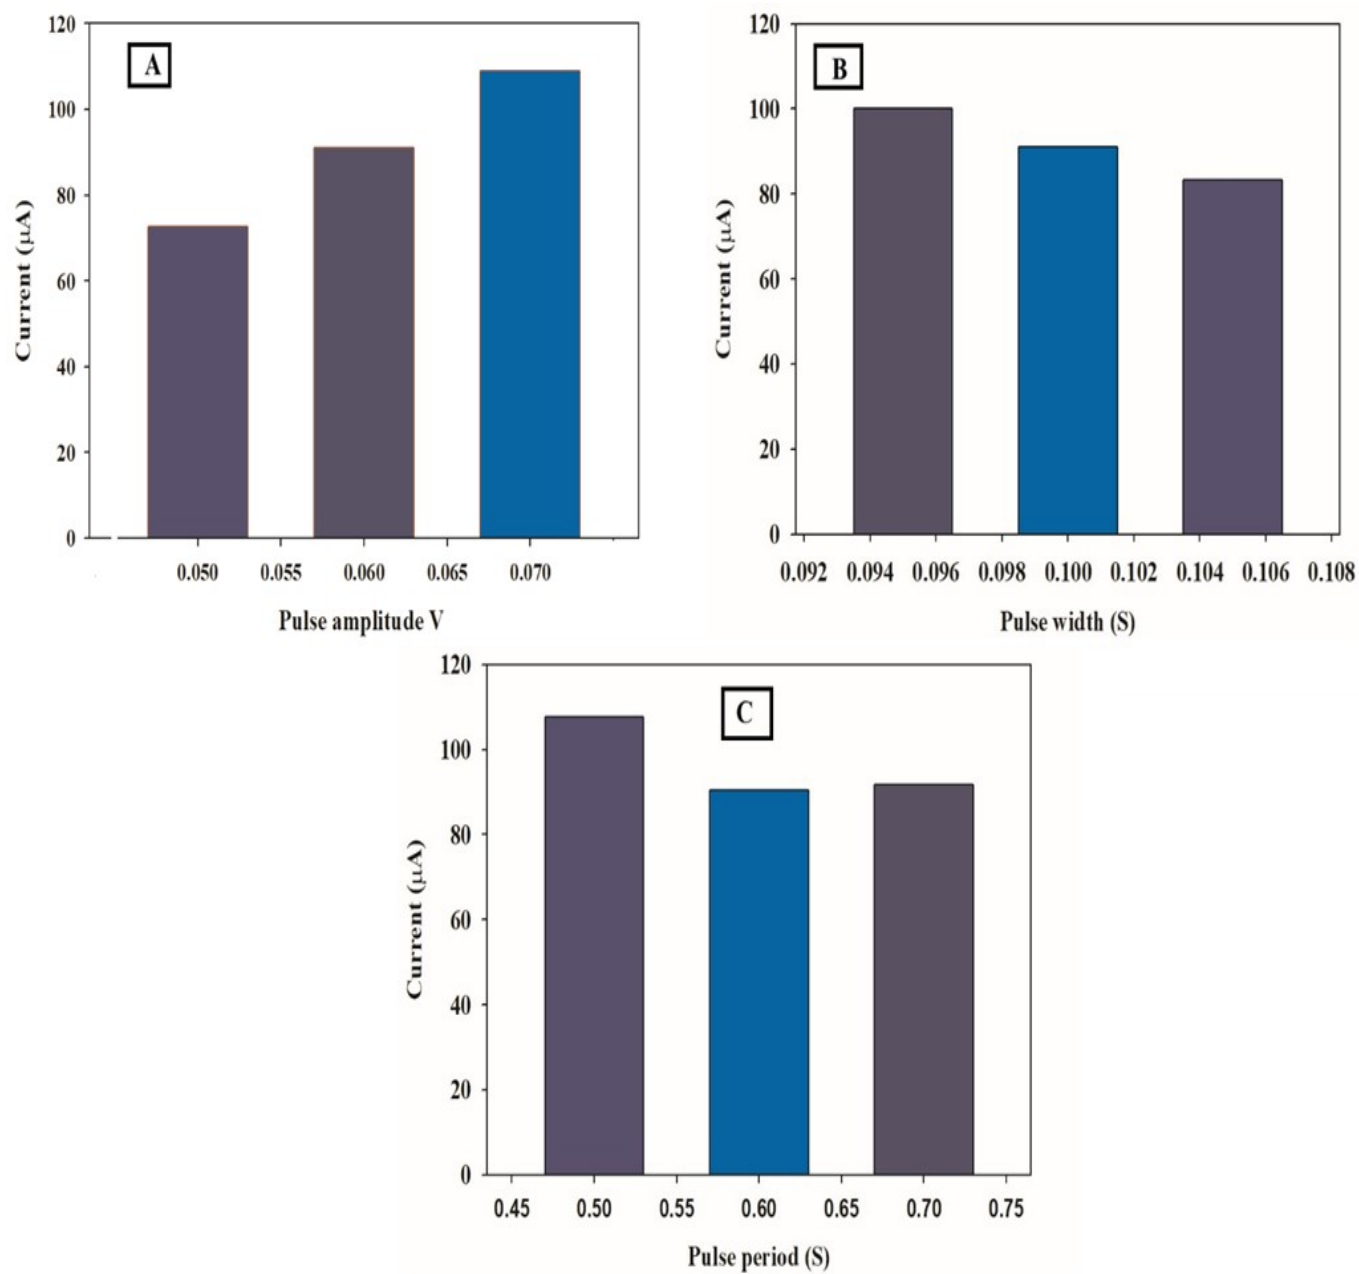

**Fig. S7** Optimization of A) Pulse amplitude B) Pulse width C) Pulse period of 1.0 mM HVA in 10 mM PBS (pH = 6) on the g-C<sub>3</sub>N<sub>4</sub>@nZVI /CPE

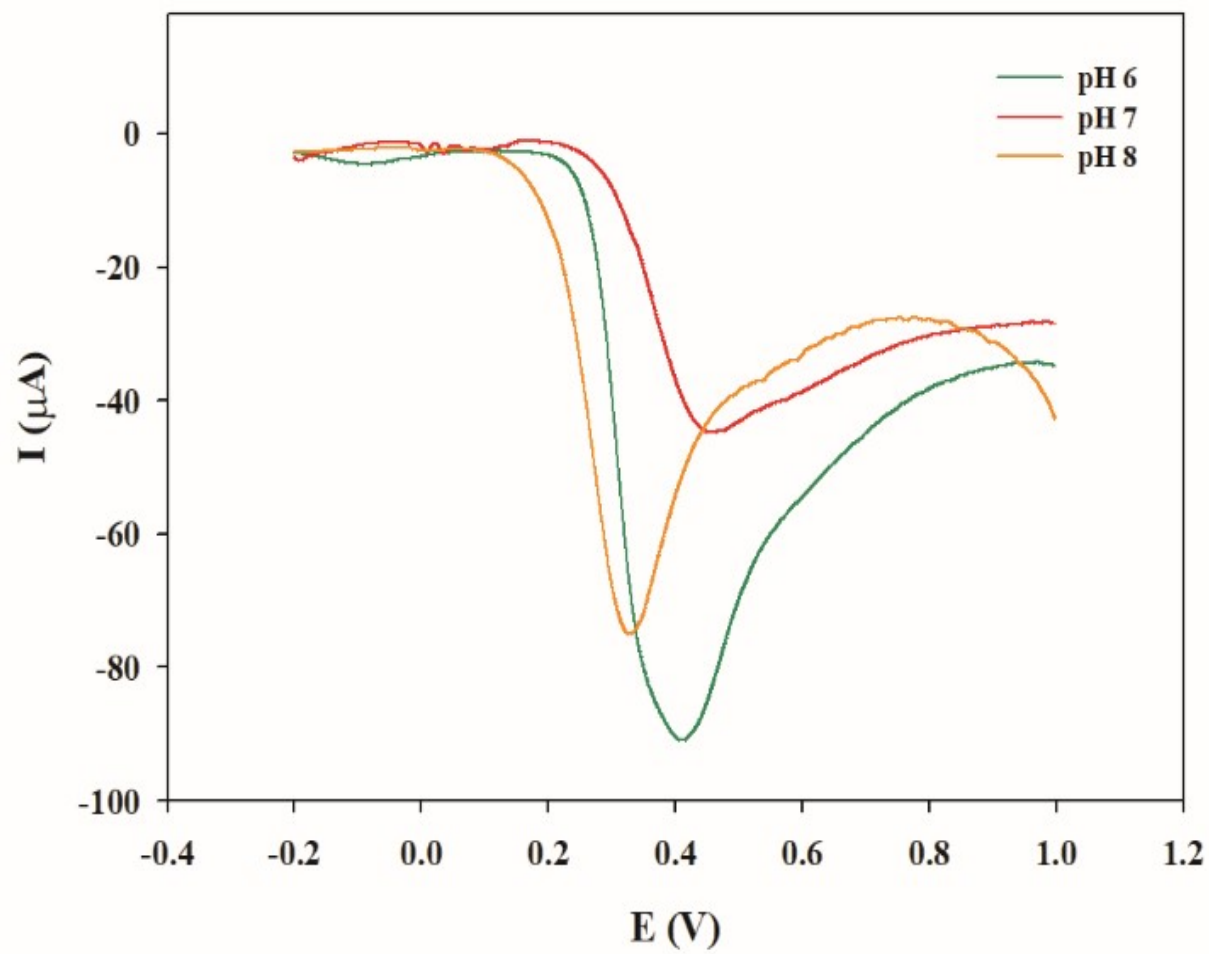

**Fig. S8** Effect of pH on the cathodic peak current ( $I_p$ ).



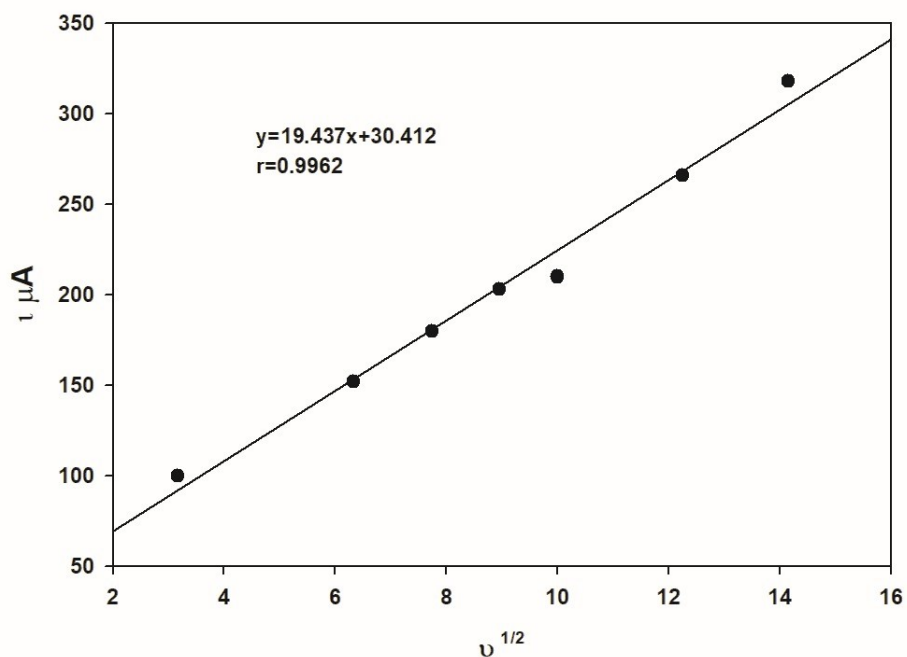

**Fig. S9** A plot of the anodic peak current ( $I_p$ ) of HVA as a function of the square root of scan rate ( $v^{1/2}$ ).

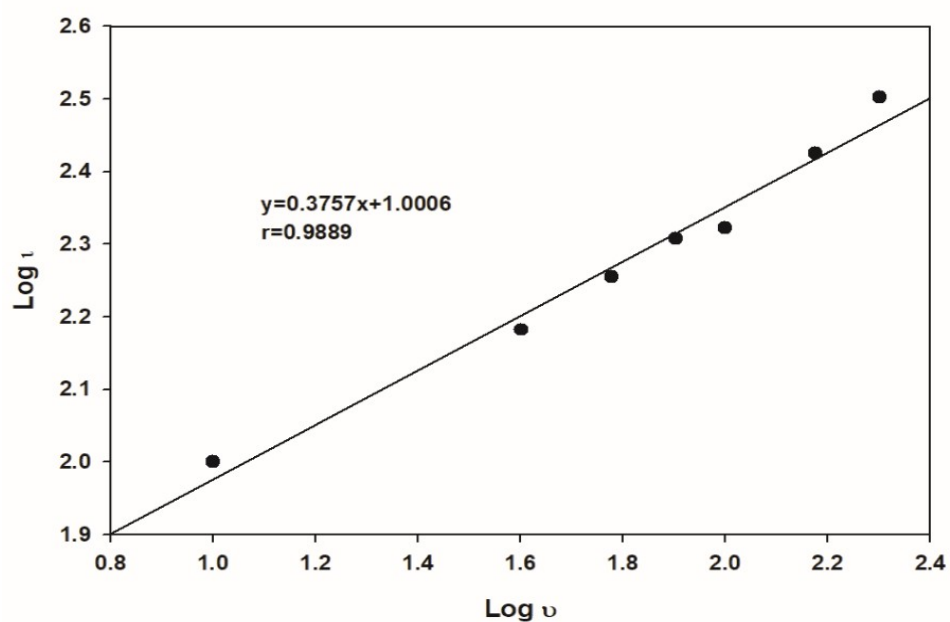

**Fig. S10** A plot of logarithm of anodic peak current ( $\log I_p$ ) of HVA as a function of the logarithm of scan rate ( $\log v$ ) using cyclic voltammetry

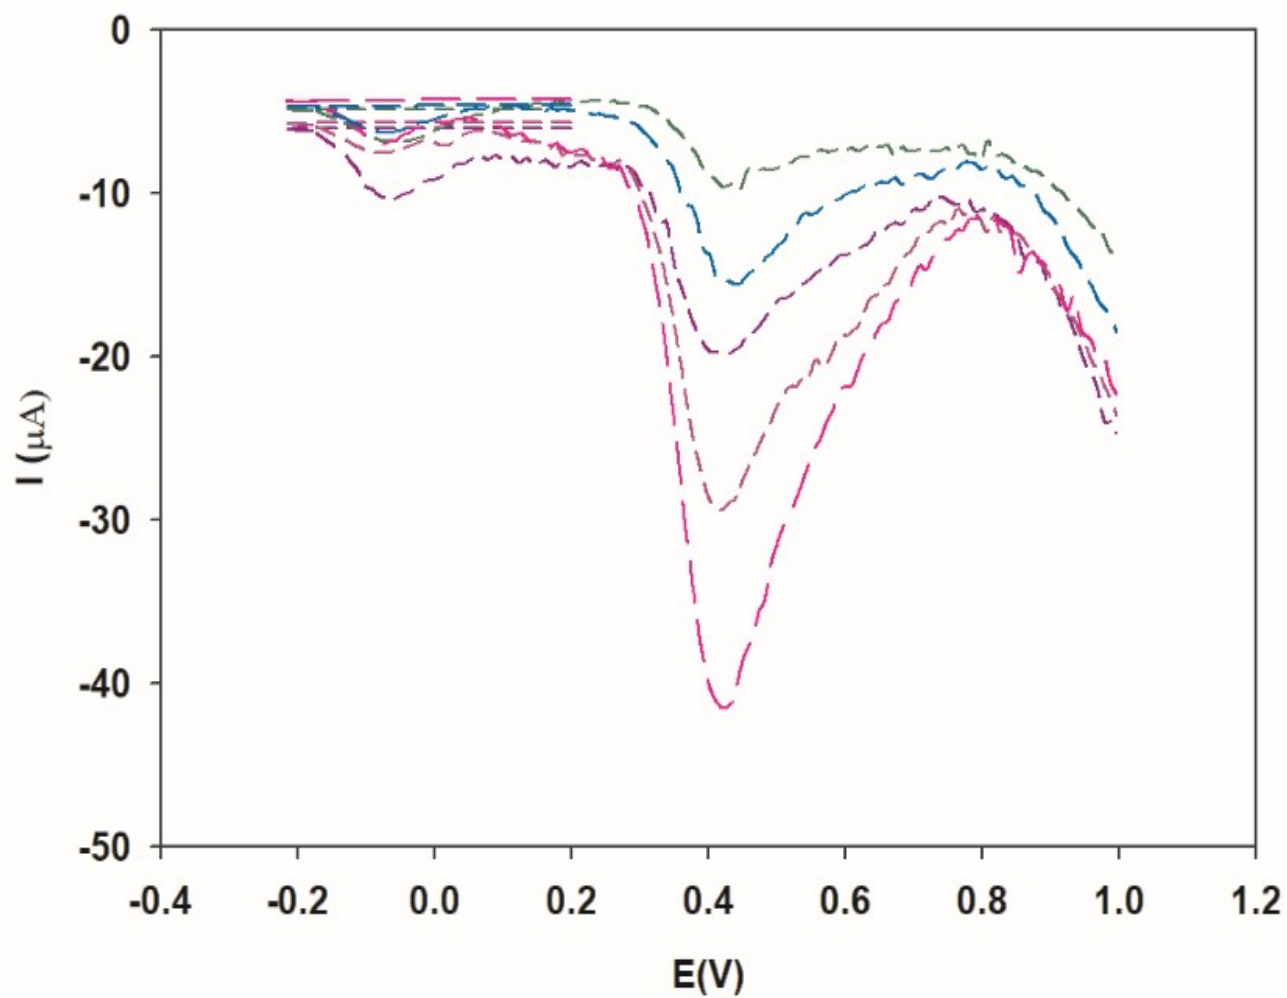

**Fig. S11** DPV of different HVA concentrations on the g -C<sub>3</sub>N<sub>4</sub>@n ZVI /CPE in 0.1 M PBS (pH = 6).
